# Supplementary material for: Limb girdle muscular disease caused by HMGCR mutation and statin myopathy treatable with mevalonolactone
Source: PubMed Central journal article supplement — Proc Natl Acad Sci U S A. 2023 Feb 6;120(7):e2217831120. doi: 10.1073/pnas.2217831120 (PMC9963716; doi:10.1073/pnas.2217831120), 2023-02-06
Supplement: pnas.2217831120.sapp.pdf [file pnas.2217831120.sapp.pdf]

1 **Limb girdle muscular disease caused by HMGCR mutation and**  
2 **statin myopathy treatable with mevalonolactone - Supplementary**

3 **Material**

4 Table of Contents

5 ***Figure S1: HMG CoA-Reductase purification ..... 2***

6 ***Figure S2: Mevalonolactone synthesis and purification process ..... 3***

7 ***Figure S3: Mevalonolactone purity assessment ..... 4***

8 ***Figure S4: Treatment timeline ..... 5***

9 ***Figure S5: Radiological features of HMGCR-LGMD ..... 6***

10 ***Figure S6: Mevalonolactone toxicity study in mice ..... 7***

11 ***Table S1: Phenotypic delineation of patients affected with LGMD ..... 8***

12 ***Table S2: Primer list ..... 11***

13 ***Table S3: Plasmid list ..... 13***

14 ***Table S4: Solutions and buffers ..... 14***

15 ***Movie S1: Improvement in muscle function of HMGCR-LGMD patient with***  
16 ***mevalonolactone treatment ..... 15***

17 ***Movie S2: Improvement in muscle function of statin-myopathy murine model with***  
18 ***mevalonolactone treatment ..... 15***

19 ***Supplemental references ..... 16***

20  
21

22 **Figure S1: HMG CoA-Reductase purification**

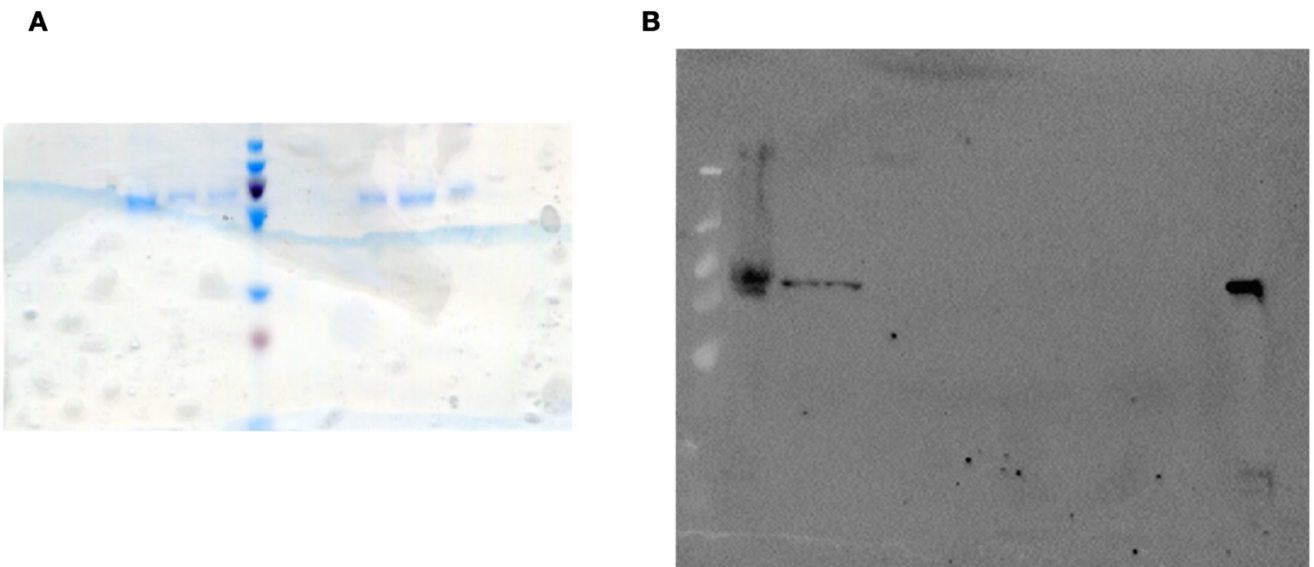

23  
24 Representative Coomassie staining (A) and western blot of purified HMGCR proteins (B).

25 Left- wildtype protein 0.6mg/ml and 0.06mg/ml, right- mutant protein 0.6mg/mL, stained  
26 with rabbit anti-HMGCR antibody.

27

28 **Figure S2: Mevalonolactone synthesis and purification process**

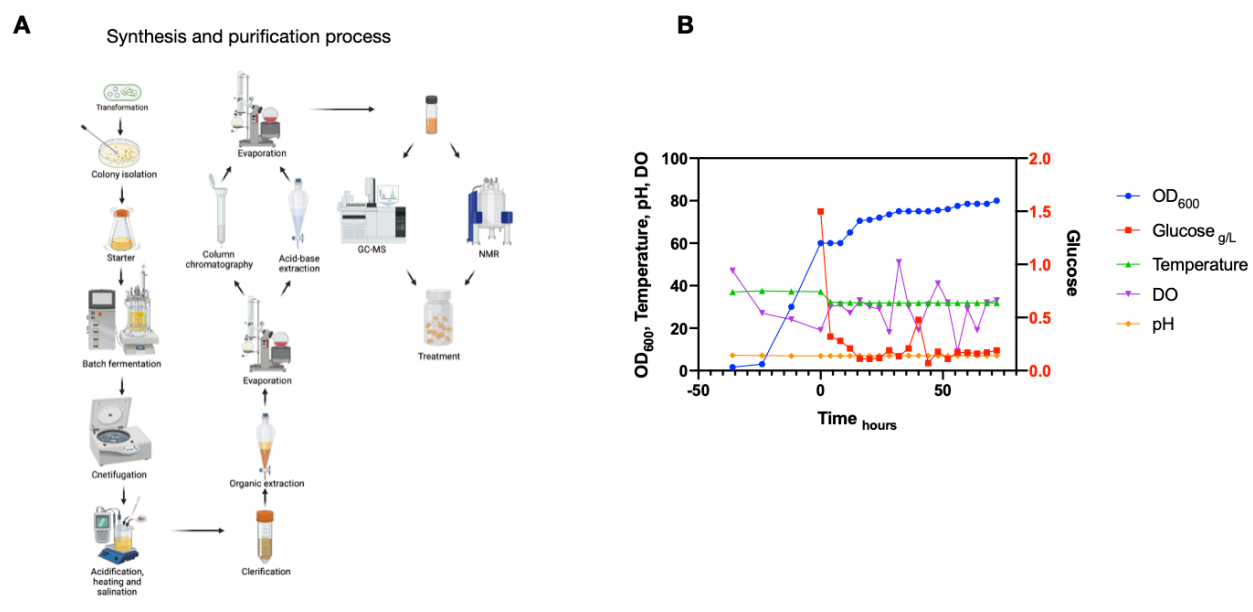

29

30 (A) Schematic representation of the synthesis and purification protocol. (B) An exemplary

31 time course of mevalonolactone batch fermentation. Induction with IPTG was performed

32 at time=0.

33

34 **Figure S3: Mevalonolactone purity assessment**

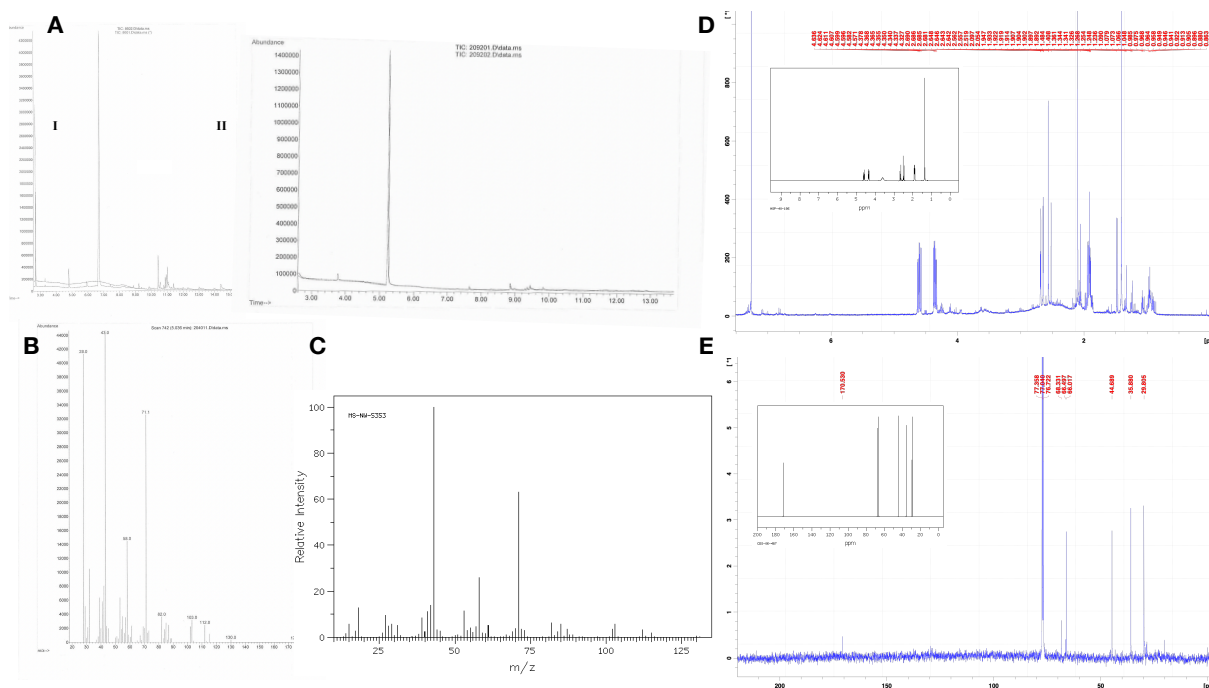

35  
 36 (A) GC-MS chromatogram of a sample produced using batch fermentation. I: original  
 37 sample and blank reference, II: the same sample after acid-base extraction. (B) Spectra  
 38 of the 5.036 peak, showing the expected fragments at 43, 71 and 58 m/z. (C) GC-MS  
 39 reference spectra for mevalonolactone, obtained from AIST SDBS. (D) Observed <sup>1</sup>H and  
 40 (E) <sup>13</sup>C-NMR spectra of samples, and expected reference spectra obtained from AIST  
 41 SDBS inset.

42



43 **Figure S4: Treatment timeline**

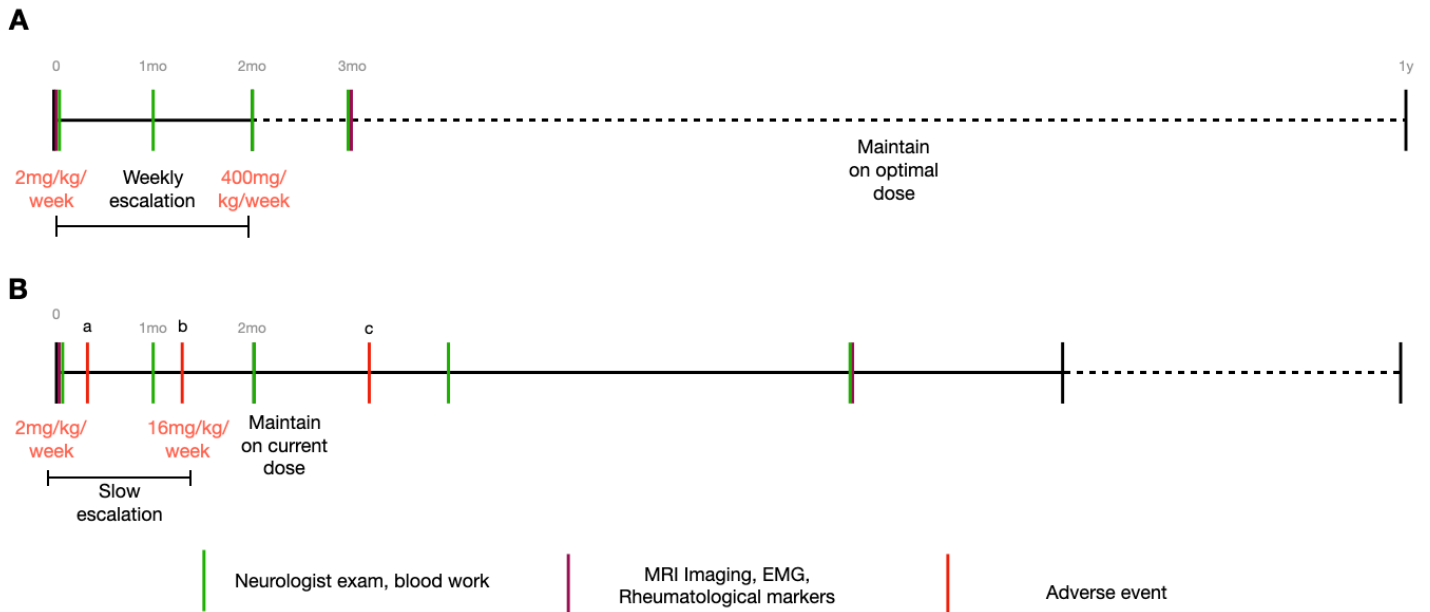

44 (A) Proposed treatment timeline, lasting one year, with an escalating dose protocol lasting  
 45 2 months. (B) Modified protocol, also indicating adverse events- (a) Subjective feeling of  
 46 swelling in the wrists (no measured difference); (b) Severe headache, resolved overnight;  
 47 (c) Near syncope.

48 **Figure S5: Radiological features of HMGCR-LGMD**

49

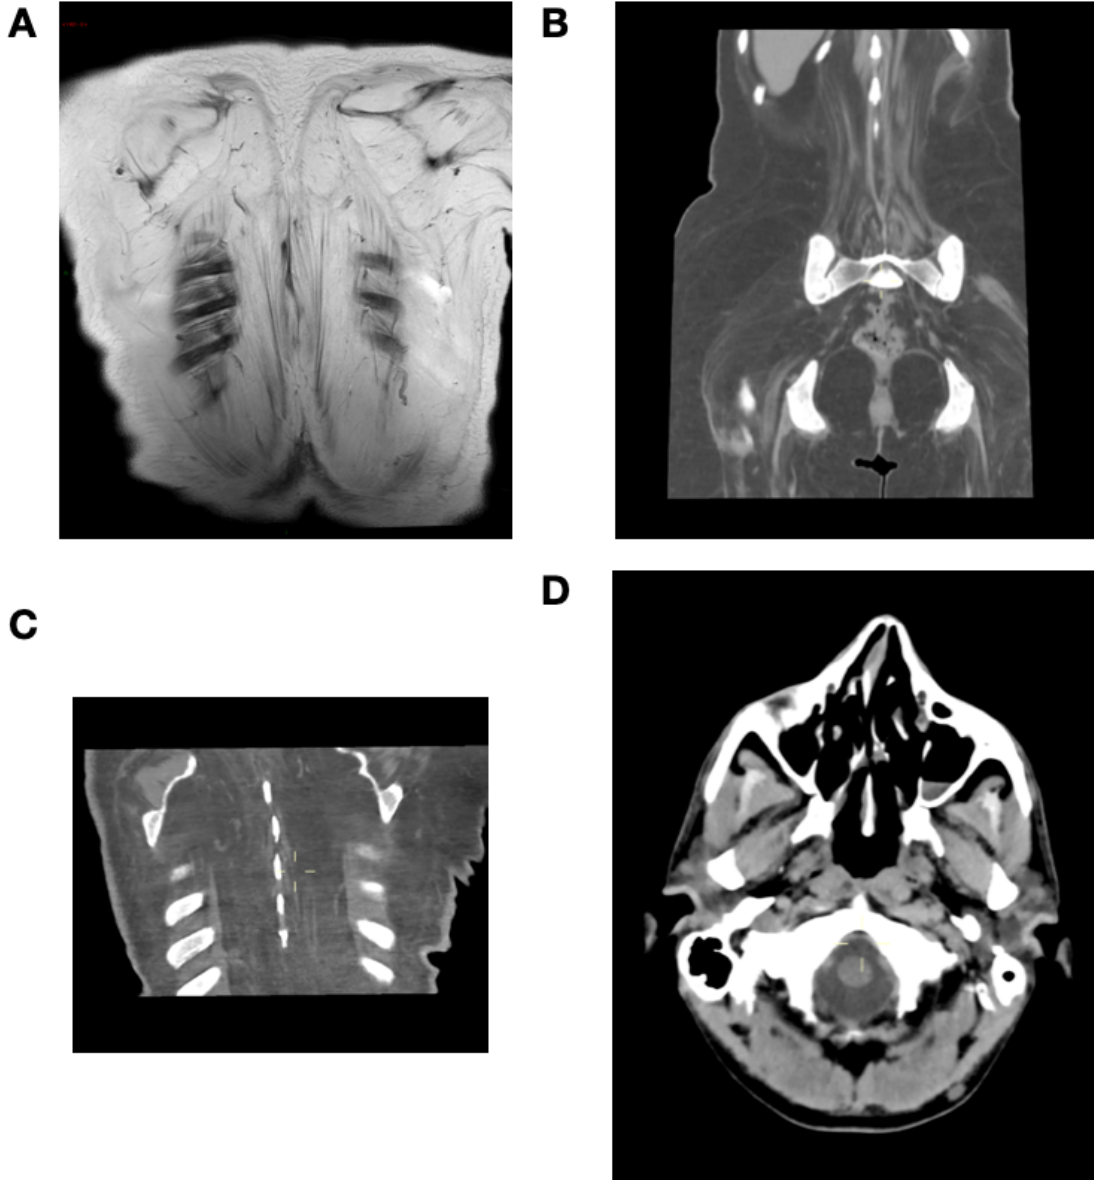

50 MRI and CT studies of HMGCR-LGMD patients showing atrophy and fatty replacement.

51 (A) T1 MRI demonstrating atrophy of the upper back muscles in patient V:2, age 49. (B)

52 CT scan showing atrophy of the lower back and thigh muscles of patient V:12, age 44.

53 (C) CT scan showing atrophy of the upper back muscles of patient V:5, age 58. (D) CT

54 scan showing sparing of facial, bulbar and neck muscles in patient V:9, age 41.

55 **Figure S6: Mevalonolactone toxicity study in mice**

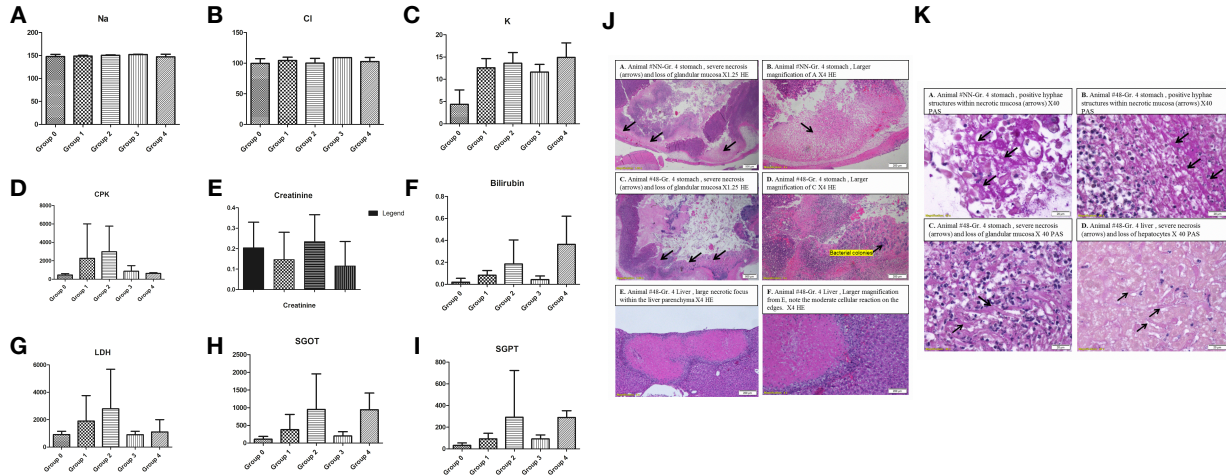

56

57 Mice were orally administered either saline (group 1) or 20mg/Kg (group 2), 200mg/Kg

58 (group 3) or 2000mg/Kg (group 4) mevalonolactone daily for 1 week (n=5 each). Mice

59 were then euthanized by CO<sub>2</sub> inhalation and blood and tissues were analyzed. Blood was

60 also analyzed from 4 animals prior to initiation of the trial (group 0). (A-I) blood tests of all

61 groups. Notice no significant differences between groups except for potassium levels.

62 This is most probably the result of euthanasia with CO<sub>2</sub>. (J-K) Abnormal finding in

63 histological studies of 2/5 mice in group 4. These are likely caused by non-related

64 infections, possibly in combination with the corrosive nature of highly concentrated large

65 dose of mevalonolactone.

66 **Table S1: Phenotypic delineation of patients affected with LGMD**

| INDIVIDUAL                                                                                  | V:2              | V:5                           | V:8                  | V:9               | V:12                | V:13                         |
|---------------------------------------------------------------------------------------------|------------------|-------------------------------|----------------------|-------------------|---------------------|------------------------------|
| <b>SEX</b>                                                                                  | F                | M                             | M                    | M                 | F                   | M                            |
| <b>AGE AT EXAMINATION</b>                                                                   | 49               | 58                            | 37                   | 42                | 51                  | 41                           |
| <b>AGE AT ONSET</b>                                                                         | 31               | 39                            | 24                   | 33                | 31                  | 34                           |
| <b>PROXIMAL STRENGTH-<br/>UPPER LIMB</b>                                                    | 0/5              | 3/5                           | 5/5                  | 5/5               | 2/5                 | 3/5                          |
| <b>LOWER LIMB</b>                                                                           | 0/5              | 2/5                           | 5/5                  | 4/5               | 2/5                 | 4/5                          |
| <b>ATROPHY –<br/>UPPER LIMB</b>                                                             | Marked           | Marked                        | -                    | -                 | Evident             | Evident                      |
| <b>LOWER LIMB</b>                                                                           | Marked           | Marked                        | -                    | -                 | Evident             | -                            |
| <b>DEEP TENDON<br/>REFLEXES</b>                                                             | Absent           | Diminished                    | +                    | +                 | Diminished          | Diminished                   |
| <b>PAIN ON EXERTION</b>                                                                     | +                | +                             | +                    | +                 | +                   | +                            |
| <b>AMBULATORY</b>                                                                           | -                | -                             | +                    | +                 | -                   | +                            |
| <b>MOBILITY RESTRICTION</b>                                                                 | Bedridden        | Wheelchair<br>bound           | -                    | -                 | Wheelchair<br>bound | Uses<br>assistive<br>devices |
| <b>RESPIRATORY<br/>DIFFICULTIES (BY<br/>PATIENT REPORT OR<br/>RESPIRATORY<br/>ACIDOSIS)</b> | +                | +                             | -                    | -                 | +                   | -                            |
| <b>DYSPHAGIA</b>                                                                            | -                | -                             | -                    | -                 | -                   | -                            |
| <b>ECHOCARDIOGRAPHY</b>                                                                     | Normal           | Mild diastolic<br>dysfunction | Normal               | Normal            | NA                  | NA                           |
| <b>CPK<br/>(REFERENCE 20-180 U/L)</b>                                                       | 167<br>(14-1466) | 1501<br>(254-9482)            | 9065<br>(1856-35761) | 477<br>(271-1039) | 542<br>(77-1428)    | 3797<br>(576-31617)          |

|                                                                         |             |            |             |             |            |             |
|-------------------------------------------------------------------------|-------------|------------|-------------|-------------|------------|-------------|
| <b>MAXIMAL TROPONIN T<br/>(0-14NG/L)</b>                                | 32.06       | 18.59      | NA          | 64.82       | 23.39      | NA          |
| <b>CREATININE</b>                                                       | 0.29        | 0.42       | 0.91        | 0.92        | 0.28       | 0.89        |
|                                                                         | (0.08-0.67) | (0.2-0.64) | (0.78-0.99) | (0.82-1.04) | (0.15-0.6) | (0.72-1.02) |
| <b>AST<br/>(REFERENCE 0-35 U/L)</b>                                     | 34          | 54         | 277         | 23          | 43         | 98          |
|                                                                         | (12-106)    | (15-241)   | (68-905)    | (19-29)     | (21-138)   | (28-566)    |
| <b>ALT<br/>(REFERENCE 0-45 U/L)</b>                                     | 31          | 50         | 322         | 15          | 44         | 80          |
|                                                                         | (9-113)     | (10-199)   | (43-911)    | (11-25)     | (12-173)   | (21-375)    |
| <b>ALKALINE<br/>PHOSPHATASE<br/>(REFERENCE 30-120 U/L)</b>              | 151         | 109        | 78          | 89          | 100        | 79          |
|                                                                         | (108-331)   | (78-130)   | (67-88)     | (65-107)    | (72-132)   | (68-94)     |
| <b>TOTAL CHOLESTEROL<br/>AVERAGE<br/>(RECOMMENDED<br/>&lt;200MG/DL)</b> | 146         | 159        | 128         | 136         | 171        | 128         |
|                                                                         | (127-167)   | (144-182)  | (111-158)   | (79-160)    | (147-211)  | (104-137)   |
| <b>TRIGLYCERIDES<br/>(RECOMMENDED<br/>&lt;150MG/DL)</b>                 | 87          | 123        | 95.5        | 108         | 149        | 167         |
|                                                                         | (47-129)    | (79-230)   | (95-96)     | (58-160)    | (55-270)   | (77-232)    |
| <b>HDL<br/>(RECOMMENDED<br/>&gt;60MG/DL)</b>                            | 49          | 49         | 38          | 45          | 55         | 41          |
|                                                                         | (31-65)     | (43-57)    | (30-46)     | (31-50)     | (30-70)    | (27-49)     |
| <b>LDL<br/>(RECOMMENDED<br/>&lt;100MG/DL)</b>                           | 80          | 87         | 77          | 67          | 82.5       | 55          |
|                                                                         | (68-99)     | (79-104)   | (62-92)     | (28-81)     | (50-112)   | (31-71)     |
| <b>VLDL</b>                                                             | 17          | 25         | 19          | 22          | 30         | 33          |
|                                                                         | (9-26)      | (15-46)    |             | (12-32)     | (11-154)   | (15-46)     |
| <b>FASTING BLOOD SUGAR</b>                                              | 390         | 123        | 127         | 111         | 124        | 155         |
| <b>ANA, RF, C3, C4<br/>ABNORMALITIES</b>                                | -           | -          | -           | NA          | -          | NA          |

|                                                                                                       |                                                          |                                                                |    |        |               |    |
|-------------------------------------------------------------------------------------------------------|----------------------------------------------------------|----------------------------------------------------------------|----|--------|---------------|----|
| <b>ANTI-SM, ANTI JO-1,<br/>ANTI-SSA/B, ANCA, AMA</b>                                                  | -                                                        | NA                                                             | NA | NA     | -             | NA |
| <b>ANTI-HMGCR AB</b>                                                                                  | -                                                        | -                                                              | -  | -      | -             | -  |
| <b>ABNORMAL BRAIN<br/>IMAGING</b>                                                                     | -                                                        | -                                                              | NA | -      | -             | -  |
| <b>MYOPATHIC CHANGES<br/>IN EMG</b>                                                                   | +                                                        | +                                                              | NA | NA     | +             | +  |
| <b>ABNORMAL NCV</b>                                                                                   | -                                                        | (+)<br>L4-5<br>radiculopathy                                   | NA | NA     | -             | -  |
| <b>MUSCLE BIOPSY-<br/>NORMAL DYSTROPHIN,<br/>NADH, SDH, COX,<br/>ATPASES, ELECTRON<br/>MICROSCOPY</b> | +                                                        | +                                                              | NA | NA     | +             | NA |
| <b>COMORBIDITIES</b>                                                                                  | Insulin<br>dependent<br>diabetes -<br>onset at age<br>19 | COPD,<br>Diastolic<br>dysfunction,<br>ICRBBB,<br>Lymphocytosis |    | ICRBBB | Single kidney |    |

67

68

69 **Table S2: Primer list**

| <b>Name</b>                   | <b>Sequence</b>           |                                                            |
|-------------------------------|---------------------------|------------------------------------------------------------|
| <b>HMGCR</b>                  | Forward                   | GGTACTGCCAGTCAGGCTG                                        |
|                               | Forward 2                 | GATAGGAACGGTGGGTGGTG                                       |
|                               | Reverse                   | TCTTGGTGCAAGCTCCTTGG                                       |
|                               | RFLP Reverse              | AAAAAAAAAAAAAAAAACCAGGATTATCTTTG<br>CATGCTCCTTGAGCA        |
| <b>HMGCR-cDNA</b>             | Forward                   | ATGTTGTCAAGACTTTTTTCGAATGCATG                              |
|                               | Reverse                   | TCAGGCTGTCTTCTTGGTGCAAG                                    |
| <b>Cloning and sequencing</b> | EcoRI-FLAG-Nostop-HMGCR_R | GAATTCCTTATCGTCGTCATCCTTGTAAAT<br>CTAAGGCTGTCTTCTTGGTGCAAG |
|                               | HMGCR-426-BmtI_F          | GCTAGCTCATCAGTACTGGTGACACAGG<br>AACC                       |
|                               | HMGCR-426-EcoRI_F         | GAATTCCTCATCAGTACTGGTGACACAGG<br>AACC                      |
|                               | HMGCR-426-MfeI_F          | CAATTGAATCATCAGTACTGGTGACACA<br>GGAACC                     |
|                               | HMGCR_mutation_F1         | ATGCTAGATGTTCAAGGAGCATGCAA                                 |
|                               | HMGCR_mutation_F2         | TTGCAGATGCTAGATGTTCAAGGAG                                  |
|                               | HMGCR_mutation_R1         | TTGAACATCTAGCATCTGCAAACAGG                                 |
|                               | HMGCR_mutation_R2         | CTCCTTGAACATCTAGCATCTGCAA                                  |
|                               | HMGCR_Seq-R               | GGTCAGTGTCAGTGTCCCCAC                                      |
|                               | HMGCR_Seq 1               | CCATGTCAGGGGTACGTCAGC                                      |
|                               | HMGCR_Seq 2               | GTAGACGTGAACCTATGCTGGTC                                    |
|                               | HMGCR_Seq 3               | CCAGCACCAATAGAGGCTGC                                       |
|                               | NdeI-HMGCR-F              | AAACATATGATGTTGTCAAGACTTTTTCG<br>AATGCATG                  |
|                               | XhoI-HMGCR-R              | AAAACCTCGAGTCAGGCTGTCTTCTTGGT<br>GCAAG                     |
|                               | XhoI-Kozak-HMGCR_F        | CTCGAGGCCACCATGTTGTCAAGACTTT<br>TTCGAATGCATG               |
|                               | HMGCR_Seq_R2              | CCACGAGTCATCCCATCTGC                                       |
|                               | <b>HMGCR sgRNA #1</b>     | Forward                                                    |
| Reverse                       |                           | AAACAGCATCTGTAGCCAGGGAGAC                                  |

|                           |                    |                                            |
|---------------------------|--------------------|--------------------------------------------|
| <b>HMGCR<br/>sgRNA #2</b> | Forward            | CACCGACACCTAGCATCTGTAGCCA                  |
|                           | Reverse            | AAACTGGCTACAGATGCTAGGTGTC                  |
| <b>HMGCR<br/>KI ssODN</b> | HMGCR_KI_<br>ssODN | CACACAATTCGGGCAAGCTGCCGGGCA                |
|                           |                    | TTTTCCCCAGGATTATCTTTGCATGCTCC              |
|                           |                    | TTGAACATCTAGCATCTGTAGCCAGGGA<br>GAGACACAAC |

| <b>SMN primers</b>     |           |                                |
|------------------------|-----------|--------------------------------|
| <b>541C960</b>         |           | GTAATAACCAAATGCAATGTGAA        |
| <b>541C1120</b>        |           | CTACAACACCCTTCTCACAG           |
| <b>R111</b>            |           | AGACTATCAACTTAATTTCTGATCA      |
| <b>Exon2a</b>          | Forward   | TGTGTGGATTAAGATGACTCTTGG       |
|                        | Reverse   | TGCCTCCACAAAGGATGACATA         |
| <b>Exon3+4</b>         | Forward   | CCTCCCCACTGATCAAAACGA          |
|                        | Reverse   | GCTACAAAAGTTTCATGGGAGAGC       |
| <b>Exon5</b>           | Forward   | AGTCTGTTTGACTTCAGGATTTGGT      |
|                        | Reverse   | GGGACTACAAGAGCACTGCAT          |
| <b>Exon7</b>           | Forward   | AAATGTCTTGTGAAACAAAATGCTT      |
|                        | RFLP      | AAAAAAAAAAAAAAAAAAAAACCTTCCTTC |
|                        | Reverse   | TTTTTGATTTTGTTT                |
|                        | Reverse   | GTCTGCTGGTCTGCCTACTA           |
| <b>Exon1</b>           | Forward   | GCGAGGCTCTGTCTCAAACA           |
|                        | Reverse   | GATCGACTTGATGCTGTCCCGA         |
| <b>Exon2b</b>          | Forward   | GGTGTATGATGCCTTTAAGAGCAGTTT    |
|                        | Reverse   | CTTCTCCCTGCCTTCCATTCACA        |
| <b>Exon6</b>           | Forward   | CAACATAGCAAGACCTCGTCT          |
|                        | Reverse   | TGCAAGAGTAATTTAAGCCTCAGA       |
| <b>Exon 8</b>          | Forward   | GTTTAACTGGTGTCCACAGAGG         |
|                        | Forward 2 | TTCGTCAAGCCTCTGGTTCT           |
|                        | Reverse   | CATACACAAAATGCTATGGTGGCA       |
|                        | Reverse 2 | CAAAATATGGGCCAAAGGGCA          |
| <b>Full<br/>length</b> | Forward   | GTTGGGGGATCAAATATCTTCTAGTGTT   |
|                        | Reverse   | CCCCACCCCAGTCTTTTACAGATGGT     |



71 **Table S3: Plasmid list**

| <b>Plasmids</b>        |                                     |
|------------------------|-------------------------------------|
| <b>Name</b>            | <b>Source</b>                       |
| pGEX-6P                | Cytiva                              |
| pGEX-6P-HMGCR-426-888  | This article                        |
| pMevT                  | Addgene plasmid #17815 <sup>1</sup> |
| pPalmitoyl-mTurquoise2 | Addgene plasmid #36209 <sup>2</sup> |
| pEF.myc.ER-E2-Crimson  | Addgene plasmid #38770 <sup>3</sup> |
| px459                  | Addgene plasmid #62988 <sup>4</sup> |

72

73 **Table S4: Solutions and buffers**

| <b>Name</b>                                                      | <b>Composition</b>                                                                                                                                                                                                         |
|------------------------------------------------------------------|----------------------------------------------------------------------------------------------------------------------------------------------------------------------------------------------------------------------------|
| <b>0.5M K<sub>2</sub>HPO<sub>4</sub> (pH=7.4) stock solution</b> | Dissolve 68.05g K <sub>2</sub> HPO <sub>4</sub> and 15.64g NaOH in 900mL DDW, titrate pH and adjust to 1L                                                                                                                  |
| <b>Buffer A – bacteria lysis buffer</b>                          | 20mM K <sub>2</sub> HPO <sub>4</sub> (pH=7.4)<br>20mM Tris (pH=7.6)<br>500mM (NH <sub>4</sub> ) <sub>2</sub> SO <sub>4</sub><br>1mM EDTA<br>2mM TCEP<br>1mM MgCl <sub>2</sub><br>10% glycerol<br>0.01% Triton X-100        |
| <b>Buffer B – wash buffer and elution buffer</b>                 | 20mM K <sub>2</sub> HPO <sub>4</sub><br>20mM Tris (pH=8)<br>200mM (NH <sub>4</sub> ) <sub>2</sub> SO <sub>4</sub><br>1mM EDTA<br>2mM TCEP<br>10% glycerol<br>For elution of GST-fused protein add 10mM reduced glutathione |
| <b>Buffer C- Ion-exchange low salt buffer</b>                    | 50mM K <sub>2</sub> HPO <sub>4</sub><br>50mM KCl<br>1mM EDTA<br>2mM TCEP                                                                                                                                                   |
| <b>Buffer D- Ion-exchange high salt buffer</b>                   | 50mM K <sub>2</sub> HPO <sub>4</sub><br>1M KCl<br>1mM EDTA<br>2mM TCEP                                                                                                                                                     |
| <b>Buffer E – HMGCR protein and assay buffer</b>                 | 100mM K <sub>2</sub> HPO <sub>4</sub><br>120mM KCl<br>1mM EDTA<br>2mM TCEP                                                                                                                                                 |

74

75

76 **Movie S1: Improvement in muscle function of HMGCR-LGMD patient with**  
77 **mevalonolactone treatment**

78 After 4 months of treatment, patient V:2 is able to fully abduct her arm when laying, an  
79 action she was unable to perform for several years prior to treatment

80

81 **Movie S2: Improvement in muscle function of statin-myopathy murine model with**  
82 **mevalonolactone treatment**

83 Mice treated with mevalonolactone (right) show much greater muscle endurance  
84 evaluated by wire-hanging test, as opposed to control mice (left).

85

86

87 **Supplemental references**

- 88 1. Martin, V. J. J., Pital, D. J., Withers, S. T., Newman, J. D., and Keasling, J. D.,  
89 Engineering a mevalonate pathway in *Escherichia coli* for production of  
90 terpenoids. *Nat. Biotechnol.*, 2003, **21**, 796–802.
- 91 2. Goedhart, J., Von Stetten, D., Noirclerc-Savoye, M., et al., Structure-guided  
92 evolution of cyan fluorescent proteins towards a quantum yield of 93%. *Nat.*  
93 *Commun.*, 2012, **3**.
- 94 3. Strack, R. L., Hein, B., Bhattacharyya, D., Hell, S. W., Keenan, R. J., and Glick, B.  
95 S., A rapidly maturing far-red derivative of DsRed-Express2 for whole-cell  
96 labeling. *Biochemistry*, 2009, **48**, 8279–8281.
- 97 4. Ran, F. A., Hsu, P. D., Wright, J., Agarwala, V., Scott, D. A., and Zhang, F.,  
98 Genome engineering using the CRISPR-Cas9 system. *Nat. Protoc.*, 2013, **8**,  
99 2281–2308.

100

101
